# Supplementary material
Source: PubMed Central journal article supplement (PMC1562334)
Supplement: bjpg55-589TableS2.pdf [file bjpg55-589TableS2.pdf]

**Supplementary Table 2. Prevalence of social problems in the second Dutch National Survey of General Practice, 2001.**

|                       | <i>n</i> | % family problems | Odds ratio        | % material problems | Odds ratio        | % work problems | Odds ratio        | % problems relationship with other people | Odds ratio        |
|-----------------------|----------|-------------------|-------------------|---------------------|-------------------|-----------------|-------------------|-------------------------------------------|-------------------|
| Total                 | 4809     | 7.9               |                   | 10.1                |                   | 6.2             |                   | 15.8                                      |                   |
| <b>Sex</b>            |          |                   |                   |                     |                   |                 |                   |                                           |                   |
| Male (reference)      | 2179     | 6.2               | 1.00              | 9.1                 | 1.00              | 6.7             | 1.00              | 14.2                                      | 1.00              |
| Female                | 2630     | 9.3               | 1.48 <sup>a</sup> | 10.8                | 1.18              | 5.9             | 0.90              | 17.1                                      | 1.26 <sup>a</sup> |
| <b>Age (years)</b>    |          |                   |                   |                     |                   |                 |                   |                                           |                   |
| 18–24 (reference)     | 352      | 6.0               | 1.00              | 20.5                | 1.00              | 7.7             | 1.00              | 15.6                                      | 1.00              |
| 25–44                 | 1667     | 7.5               | 1.04              | 12.0                | 0.88              | 9.8             | 1.64 <sup>b</sup> | 17.9                                      | 1.57 <sup>b</sup> |
| 45–64                 | 1786     | 8.6               | 1.04              | 8.2                 | 0.56 <sup>a</sup> | 6.0             | 1.12              | 15.8                                      | 1.38              |
| 65–74                 | 554      | 9.0               | 0.98              | 6.1                 | 0.32 <sup>a</sup> | 0.2             | 0.04 <sup>a</sup> | 13.9                                      | 1.20              |
| ≥75                   | 450      | 7.1               | 0.74              | 7.1                 | 0.30 <sup>a</sup> | 0.2             | 0.05 <sup>a</sup> | 10.0                                      | 0.89              |
| <b>Education</b>      |          |                   |                   |                     |                   |                 |                   |                                           |                   |
| Primary               | 732      | 10.8              | 1.82 <sup>a</sup> | 13.4                | 2.62 <sup>a</sup> | 1.9             | 0.41 <sup>a</sup> | 15.6                                      | 1.42 <sup>a</sup> |
| Lower                 | 1658     | 8.3               | 1.29              | 9.7                 | 1.41              | 5.3             | 0.66 <sup>b</sup> | 17.9                                      | 1.41 <sup>a</sup> |
| Secondary             | 1408     | 7.1               | 1.15              | 9.9                 | 1.13              | 7.0             | 0.72 <sup>b</sup> | 13.9                                      | 0.97              |
| Higher (reference)    | 1007     | 6.4               | 1.00              | 8.4                 | 1.00              | 9.7             | 1.00              | 14.9                                      | 1.00              |
| <b>Marital status</b> |          |                   |                   |                     |                   |                 |                   |                                           |                   |
| Married (reference)   | 3178     | 7.8               | 1.00              | 5.9                 | 1.00              | 5.3             | 1.00              | 14.8                                      | 1.00              |
| Unmarried             | 996      | 5.6               | 0.75              | 17.6                | 2.37 <sup>a</sup> | 10.5            | 1.74 <sup>a</sup> | 19.7                                      | 1.61 <sup>a</sup> |
| Divorced              | 264      | 17.8              | 2.49 <sup>a</sup> | 21.2                | 3.78 <sup>a</sup> | 8.7             | 1.82 <sup>b</sup> | 21.6                                      | 1.58 <sup>a</sup> |
| Widowed               | 371      | 8.4               | 1.00              | 9.4                 | 1.82 <sup>a</sup> | 1.1             | 0.97              | 9.7                                       | 0.69              |

<sup>a</sup>P<0.005. <sup>b</sup>P<0.05.
