# Supplementary material
Source: PubMed Central journal article supplement (PMC1562334)
Supplement: bjpg55-589TableS3.pdf [file bjpg55-589TableS3.pdf]

**Supplementary Table 3. Patients with a psychological or social diagnosis in relation to sociodemographic characteristics and mental health as measured by the GHQ in the first Dutch National Survey of General Practice, 1987.**

|                           | <i>n</i> | %<br>Psychological<br>diagnosis | Odds<br>ratio     | %<br>Social<br>diagnosis | Odds<br>ratio     |
|---------------------------|----------|---------------------------------|-------------------|--------------------------|-------------------|
| Total                     | 8924     | 7.2                             |                   | 1.5                      |                   |
| Sex                       |          |                                 |                   |                          |                   |
| Male (reference)          | 4354     | 5.0                             | 1.00              | 1.0                      | 1.00              |
| Female                    | 4570     | 9.1                             | 1.54 <sup>a</sup> | 1.9                      | 1.46              |
| Age (years)               |          |                                 |                   |                          |                   |
| 18–24 (reference)         | 1237     | 3.9                             | 1.00              | 1.3                      | 1.00              |
| 25–44                     | 4059     | 5.0                             | 0.99              | 1.1                      | 0.56              |
| 45–64                     | 2407     | 9.5                             | 1.81 <sup>a</sup> | 1.6                      | 0.71              |
| 65–74                     | 833      | 11.5                            | 2.03 <sup>a</sup> | 2.0                      | 0.88              |
| ≥75                       | 388      | 15.6                            | 2.59 <sup>a</sup> | 3.7                      | 1.31              |
| Education                 |          |                                 |                   |                          |                   |
| Primary                   | 2411     | 10.6                            | 1.50 <sup>b</sup> | 1.9                      | 1.74              |
| Lower                     | 3711     | 7.0                             | 1.37              | 1.4                      | 1.82              |
| Secondary                 | 1798     | 5.2                             | 1.12              | 1.5                      | 1.88              |
| Higher (reference)        | 1004     | 4.5                             | 1.00              | 0.9                      | 1.00              |
| Marital status            |          |                                 |                   |                          |                   |
| Married (reference)       | 5335     | 7.3                             | 1.00              | 1.4                      | 1.00              |
| Unmarried                 | 2891     | 3.9                             | 0.55 <sup>a</sup> | 0.9                      | 0.45 <sup>b</sup> |
| Divorced                  | 256      | 14.6                            | 1.72 <sup>a</sup> | 3.1                      | 1.43              |
| Widowed                   | 442      | 19.7                            | 1.44 <sup>b</sup> | 4.7                      | 2.08 <sup>b</sup> |
| GHQ                       |          |                                 |                   |                          |                   |
| <2                        | 7446     | 5.0                             | 1.00              | 1.0                      | 1.00              |
| ≥2                        | 1478     | 17.6                            | 4.22 <sup>a</sup> | 3.8                      | 3.12 <sup>a</sup> |
| Family                    |          |                                 |                   |                          |                   |
| +                         | 8391     |                                 |                   | 1.3                      | 1.00              |
| –                         | 533      |                                 |                   | 4.1                      | 2.13 <sup>a</sup> |
| Material                  |          |                                 |                   |                          |                   |
| +                         | 7840     |                                 |                   | 1.3                      | 1.00              |
| –                         | 1084     |                                 |                   | 2.5                      | 1.23              |
| Work                      |          |                                 |                   |                          |                   |
| +                         | 8353     |                                 |                   | 1.4                      | 1.00              |
| –                         | 571      |                                 |                   | 2.7                      | 2.09 <sup>b</sup> |
| Relationships with others |          |                                 |                   |                          |                   |
| +                         | 7731     |                                 |                   | 1.3                      | 1.00              |
| –                         | 1193     |                                 |                   | 2.2                      | 0.97              |

<sup>a</sup>*P*<0.005. <sup>b</sup>*P*<0.05.
