# Supplementary material
Source: PubMed Central journal article supplement (PMC1562334)
Supplement: bjpg55-589TableS4.pdf [file bjpg55-589TableS4.pdf]

**Supplementary Table 4. Patients with a psychological or social diagnosis in relation to sociodemographic characteristics and mental health as measured by the GHQ in second Dutch National Survey of General Practice, 2001.**

|                           | <i>n</i>          | %<br>Psychological<br>diagnosis | Odds<br>ratio     | %<br>Social<br>diagnosis | Odds<br>ratio     |
|---------------------------|-------------------|---------------------------------|-------------------|--------------------------|-------------------|
| Total                     | 9685              | 4.2                             |                   | 0.9                      |                   |
| Sex                       |                   |                                 |                   |                          |                   |
| Male (reference)          | 5357              | 2.9                             | 1.00              | 0.7                      | 1.00              |
| Female                    | 4328              | 5.3                             | 1.69 <sup>a</sup> | 1.1                      | 0.96              |
| Age (years)               |                   |                                 |                   |                          |                   |
| 18–24 (reference)         | 745               | 2.7                             | 1.00              | 0.5                      | 1.00              |
| 25–44                     | 3428              | 3.4                             | 1.27              | 0.8                      | 0.76              |
| 45–64                     | 3525              | 4.5                             | 1.80 <sup>a</sup> | 1.2                      | 0.86              |
| 65–74                     | 1146              | 4.8                             | 1.73              | 0.6                      | 0.27              |
| ≥75                       | 841               | 7.3                             | 2.20 <sup>a</sup> | 1.1                      | 0.55              |
| Education                 |                   |                                 |                   |                          |                   |
| Primary                   | 1436              | 6.9                             | 1.37              | 1.3                      | 2.68              |
| Lower                     | 3256              | 3.9                             | 0.92              | 1.2                      | 2.50              |
| Secondary                 | 2927              | 3.6                             | 1.02              | 0.7                      | 1.56              |
| Higher (reference)        | 2053              | 3.8                             | 1.00              | 0.4                      | 1.00              |
| Marital status            |                   |                                 |                   |                          |                   |
| Married (reference)       | 6396              | 3.8                             | 1.00              | 0.8                      | 1.00              |
| Unmarried                 | 2039              | 3.6                             | 1.10              | 0.7                      | 0.48              |
| Divorced                  | 496               | 6.5                             | 1.37              | 1.8                      | 0.64              |
| Widowed                   | 745               | 8.6                             | 1.50 <sup>a</sup> | 1.5                      | 2.62              |
| GHQ                       |                   |                                 |                   |                          |                   |
| <2                        | 7454              | 3.0                             | 1.00              | 0.5                      | 1.00              |
| ≥2                        | 2202              | 8.6                             | 2.94 <sup>b</sup> | 2.3                      | 2.66 <sup>b</sup> |
| Family                    |                   |                                 |                   |                          |                   |
| +                         | 4416 <sup>c</sup> |                                 |                   | 0.8                      | 1.00              |
| –                         | 381               |                                 |                   | 4.2                      | 3.37 <sup>b</sup> |
| Material                  |                   |                                 |                   |                          |                   |
| +                         | 4317 <sup>c</sup> |                                 |                   | 0.8                      | 1.00              |
| –                         | 480               |                                 |                   | 2.5                      | 1.70              |
| Work                      |                   |                                 |                   |                          |                   |
| +                         | 4499 <sup>c</sup> |                                 |                   | 0.9                      | 1.00              |
| –                         | 298               |                                 |                   | 2.0                      | 1.42              |
| Relationships with others |                   |                                 |                   |                          |                   |
| +                         | 4043 <sup>c</sup> |                                 |                   | 0.9                      | 1.00              |
| –                         | 754               |                                 |                   | 1.6                      | 0.97              |

<sup>a</sup>P<0.05. <sup>b</sup>P<0.005. <sup>c</sup>These variables were assessed at half of the sample.
